# Supplementary material for: Modulation of Pro-Oxidant and Pro-Inflammatory Activities of M1 Macrophages by the Natural Dipeptide Carnosine
Source: MDPI journal article supplement (doi:10.3390/ijms21030776), 2020-01-25
Supplement: s1 [file s1]

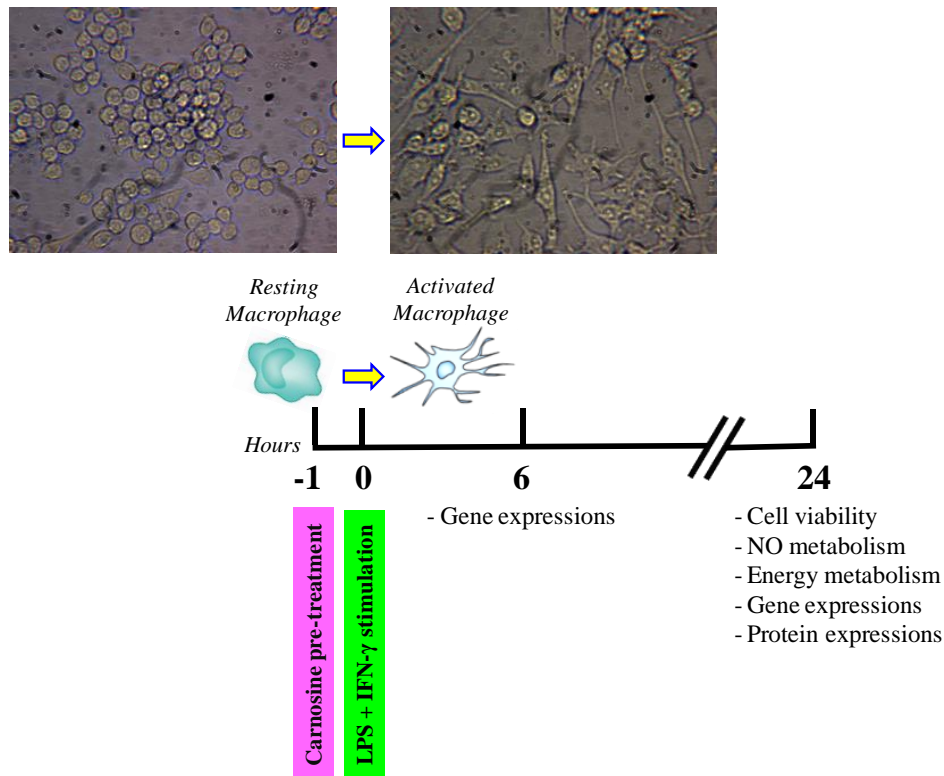

**Figure S1.** The protocol and methods employed to evaluate cell viability (MTT assay), energy metabolism (HPLC), gene expressions (high-throughput real-time PCR (qRT-PCR)), protein expressions (western blot) and nitric oxide production (qRT-PCR, HPLC), in activated macrophages.

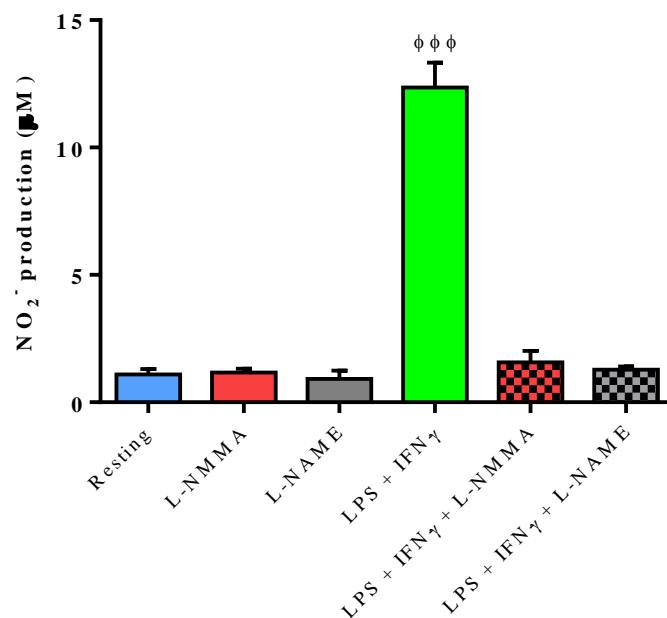

**Figure S2.** Extracellular concentrations of nitrite in resting RAW 264.7 macrophages and in macrophages stimulated for 24 h with LPS + IFN-γ (100 ng/mL + 600 U/mL, respectively), in the absence or in the presence of L-NMMA (500 μM) or L-NAME (1 mM) (1 h pretreatment). L-NMMA = N<sup>G</sup>-Monomethyl-L-arginine; L-NAME = N<sup>ω</sup>-Nitro-L-Arginine Methyl Ester. Values are means ± SD of three independent experiments. \*\*\*p < 0.001 vs. all other treatments.
